# Supplementary material for: Hetero-structured Ru–Mo2C nanoparticles loaded on N,P co-doped carbon for a pH universal hydrogen evolution reaction
Source: Royal Society of Chemistry journal article supplement (doi:10.1039/d4dt02125h), 2024-01-01
Supplement: d4dt02125h1.pdf [file d4dt02125h1.pdf]

## Electronic Supplementary Information

### Hetero-structured Ru-Mo<sub>2</sub>C nanoparticles loaded on N, P co-doped carbon for pH universal hydrogen evolution reaction

Yanqiang Li,<sup>a, b</sup> Zhuo Zhang,<sup>a</sup> Yingying Yao,<sup>c</sup> Zi'an Wang,<sup>a</sup> Zhongzheng Yang,<sup>a, b</sup>  
Yuping Tong,<sup>\*, a, b</sup> Siru Chen<sup>\*, c</sup>

<sup>a</sup> School of Materials Science and Engineering, North China University of Water Resources and Electric Power, Zhengzhou, 450045, China E-mail: lyqncwu@126.com; yptong\_zz@163.com

<sup>b</sup> Henan Engineering Research Center on Special Materials and Applications of Water Conservancy and Hydropower Engineering, Zhengzhou, 450045, China

<sup>c</sup> School of Material and Chemical Engineering, Center for Advanced Materials Research, Zhongyuan University of Technology, Zhengzhou, 450007, China E-mail: siruchen@zut.edu.cn

## 1. Materials characterization

The microstructure of the catalysts was observed by scanning electron microscope (SEM, Nova Nano SEM 450) and transmission electron microscopy (TEM, JEM-2100F). The catalyst's phase and composition were measured by X-ray diffraction (XRD, Lab XRD-7000s) and X-ray photoelectron spectroscopy (XPS, ESCALAB250Xi). The gas adsorption-desorption curves were measured on a surface area analyzer (Micromeritics 3020 instrument).

## 2. Electrochemical Measurements

Electrochemical measurements were performed in 1.0 M KOH using the standard three-electrode system. Graphite rod, Ag/AgCl (KCl saturated) electrode, and electrocatalyst modified glassy carbon electrode (polished using  $\alpha$ -Al<sub>2</sub>O<sub>3</sub>) are used as the counter electrode, reference electrode, and working electrode, respectively. The catalyst ink is prepared by dispersing 5 mg catalyst into a mixture of 480  $\mu$ L H<sub>2</sub>O, 480  $\mu$ L ethanol and 40  $\mu$ L Nafion. The 16  $\mu$ L catalyst ink was dipped onto the glass carbon and dried naturally under room temperature. The loading of catalysts is 0.4 mg m<sup>-2</sup>, and the Ru content for Ru-Mo<sub>2</sub>C@NPC is 0.023 mg cm<sup>-2</sup>. The linear sweep voltammetry (LSV) test is performed at a scan rate of 5 mVs<sup>-1</sup> with 85% IR compensation. Electrochemical impedance spectroscopy (EIS) was measured at a frequency of 0.01-10<sup>5</sup> Hz at 0.5 V.

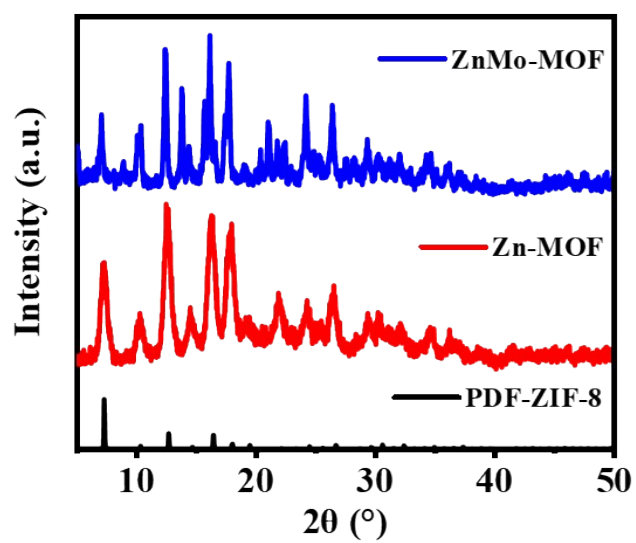

Figure S1. XRD patterns of Zn-MOF and ZnMo-MOF.

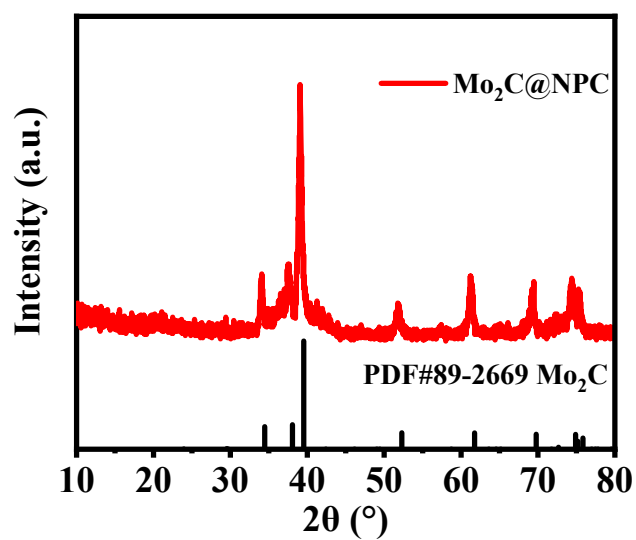

Figure S2. XRD pattern of Mo<sub>2</sub>C@NPC.

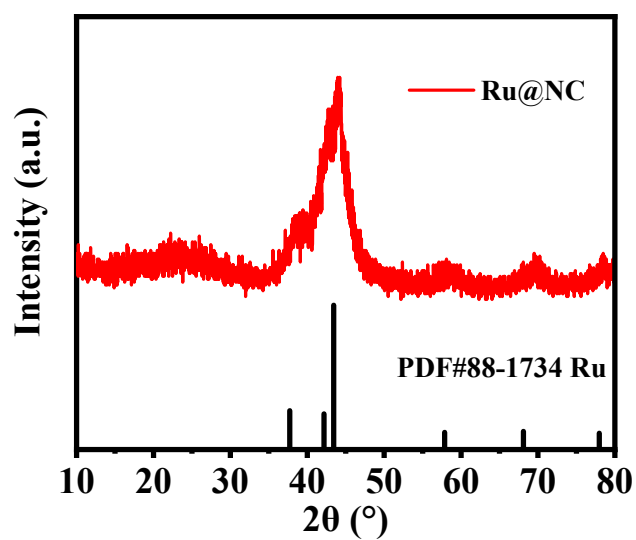

Figure S3. XRD pattern of Ru@NC.

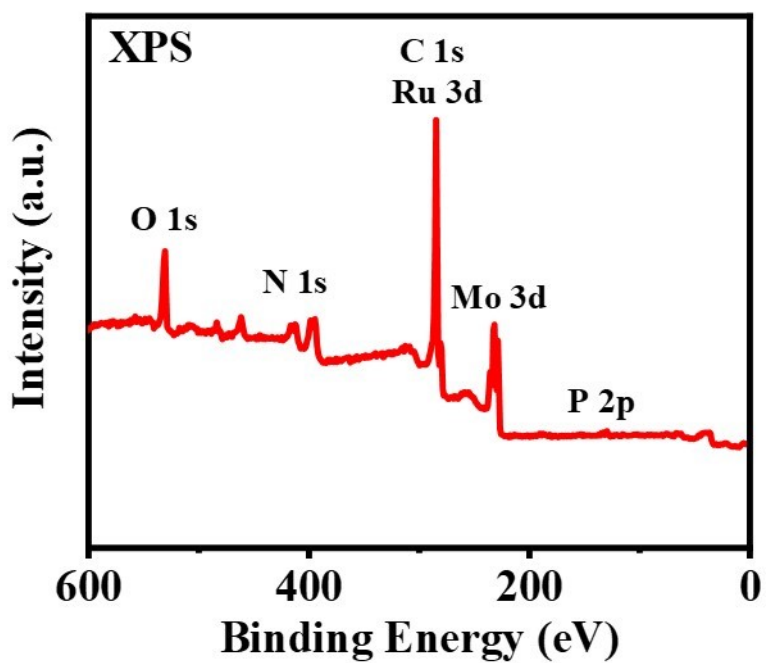

Figure S4. XPS survey spectra of Ru-Mo<sub>2</sub>C@NPC.

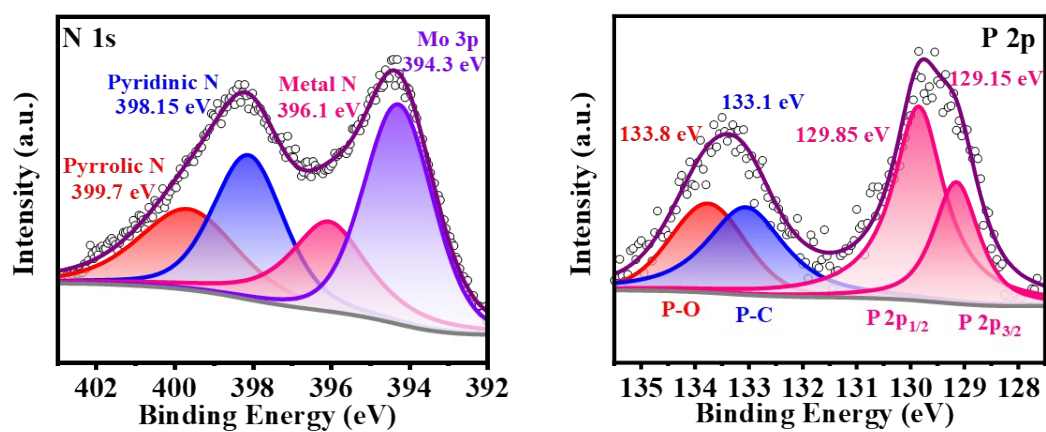

Figure S5. N 1s and P 2p spectra of Ru-Mo<sub>2</sub>C@NPC.

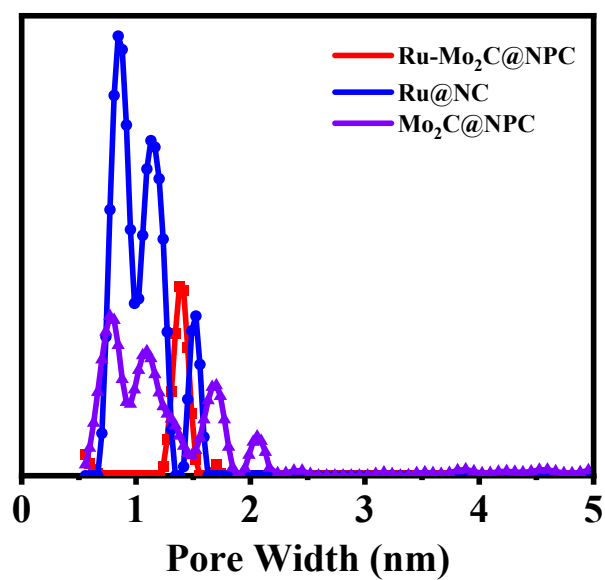

Figure S6. Pore size distribution of the catalysts.

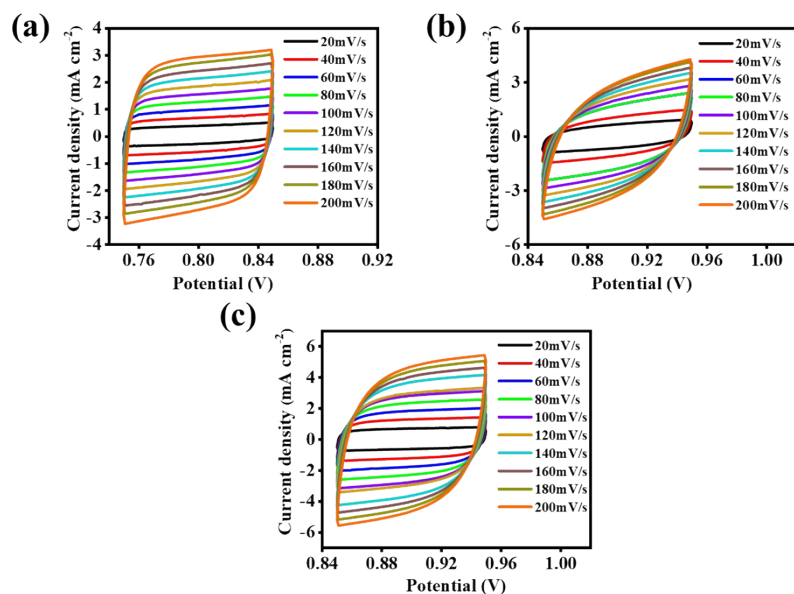

**Figure S7.** The CV curves of Ru-Mo<sub>2</sub>C@NPC (a), Ru@NC (b) and Mo<sub>2</sub>C@NPC in 0.5 M H<sub>2</sub>SO<sub>4</sub>.

**Table S1** Comparison of HER properties of Ru-Mo<sub>2</sub>C@NPC and other molybdenum carbide-based catalysts

| Materials                | Electrolyte                        | $\eta_{10}$ (HER, mV) | Ref.      |
|--------------------------|------------------------------------|-----------------------|-----------|
| Ru-Mo <sub>2</sub> C@NPC | 1 M KOH                            | 64                    | This work |
|                          | 0.5 H <sub>2</sub> SO <sub>4</sub> | 62                    |           |
|                          | 1 M PBS                            | 170                   |           |
| Ru/Mo <sub>2</sub> C     | 1 M KOH                            | 35                    | [1]       |
|                          | 0.5 H <sub>2</sub> SO <sub>4</sub> | 44                    |           |
| Ru-Mo <sub>2</sub> C@CSC | 1 M PBS                            | 196                   | [2]       |
|                          | 1 M KOH                            | 40                    |           |
| Mo <sub>2</sub> C/CN     | 1 M KOH                            | 34                    | [3]       |
|                          | 1 M KOH                            | 51                    |           |
| Ru@2H-MoS <sub>2</sub>   | 0.5 H <sub>2</sub> SO <sub>4</sub> | 168                   | [4]       |
|                          | 1 M PBS                            | 137                   |           |
|                          | 1 M KOH                            | 47                    |           |
| Ru-CoP                   | 0.5 H <sub>2</sub> SO <sub>4</sub> | 80                    | [5]       |
|                          | 1 M PBS                            | 107                   |           |
|                          | 1 M KOH                            | 64                    |           |
| HMCs@Ru                  | 0.5 H <sub>2</sub> SO <sub>4</sub> | 2.8                   | [6]       |
|                          | 0.5 M PBS                          | 78                    |           |

## Reference

1. H. Jayawardana, B. Yusuf, S. Meng, Y. Li, H. Ren, Q. Nie, Y. Xu, J. Xie and M. Chen, *J. Alloys Compd.*, 2024, **997**, 174809.
2. Y. Feng, W. A, F. Gao, T. Shen, Y. Du, Z. Ding, T. Yang, C. Wang, G. Huang, T. Cao, Y. Zhang, S. Xu, *Fuel*, 2025, **379**, 133085.
3. J. Chen, C. Chen, Y. Chen, H. Wang, S. Mao, Y. Wang, *J. Catal.*, 2020, **392**, 313-321.
4. J. Wang, W. Fang, Y. Hu, Y. Zhang, J. Dang, Y. Wu, B. Chen, H. Zhao, Z. Li, *Appl. Catal. B-Environ.*, 2021, **298**, 120490.
5. Y. Wang, R. Liu, W. Xiao, X. Wang, B. Li, Z. Li, Z. Wu, L. Wang, *Fuel*, 2023, **334**, 126635.
6. X. Ma, H. Xiao, Y. Jing, Y. Gao, Y. He, M. Zhao, J. Jia, H. Wu, *Rare Met.*, 2023, **42**, 4015-4028.
